# Supplementary material
Source: publisher site journal article supplement (https://www.dovepress.com/get_supplementary_file.php?f=239471.docx)
Supplement: Supplementary file 1 [file get_supplementary_file.php]

**Supplemental material**

**Methods used in nephrotoxicity**

Traditional methods to identify putative and/or protective proteins in mechanisms of nephrotoxicity have used one (separation by size) and two (separation by size and charge) dimensional PAGE gels or ELISA. Several newer methods for absolute quantification of proteins utilize tryptic digestion of protein bands from SDS- or 2D-PAGE gels coupled with highly sensitive mass spectrometry (MS) methods, e.g. Matrix-Assisted Laser Desorption Ionization Time-Of-Flight (MALDI-TOF) MS or nanoelectrospray ionization (NanoESI) MS [1](#_ENREF_1), [2](#_ENREF_2). Additional novel methods are Stable Isotope Labeling by Amino Acids in Cell Culture (SILAC), Mass Spectrometry Imaging (MSI) of tissue, and Inverse Ligand Binding predictions (ILbind). Methods to evaluate proteomic interactions within specific kidney cellular structures, such as kidney cortex, medulla, and mitochondria have also been reported [1](#_ENREF_1), [3](#_ENREF_3), [4](#_ENREF_4). These novel methods can also be applied toward interventions that block toxic adverse drug effects and/or to isolate and measure biomarkers for the sensitive and early detection of the toxicity. The reader is referred to Table 1 for a summary of representative publications on these novel proteomic methodologies[1-8](#_ENREF_1).

Vancomycin is a vintage medication with nephrotoxicity occurring in up to 45% of patients [9](#_ENREF_9). Li, et al. incorporated a quantitative proteomics approach using HK-2 cells to identify proteins that interact with vancomycin in order to understand the putative cellular pathways [7](#_ENREF_7). SILAC is a high throughput method for determining protein expression changes in cells [10](#_ENREF_10). The method substitutes heavy amino acids for essential amino acids. Pathways and proteins that regulate endothelial-mesenchymal transition (EMT), programmed cell death, redox, and cell cycle (G2/M DNA damage check point signaling) were identified as potential contributors toward cellular toxicity.

The polymyxins are a drug mixture used in the treatment of antimicrobial resistance, with nephrotoxicity occurring in up to 50% of patients [11](#_ENREF_11). Nilsson, et al., recently mapped the distribution of polymyxin derivatives and metabolites to kidney cortex using MSI [8](#_ENREF_8) and reported increased kidney abundance with repeated dosing. Higher cortex to medulla ratios were reported for compounds with the highest nephrotoxicity potential. A benefit of MSI is insight into the kidney structures and related proteins affected by a particular nephrotoxicant and its metabolites. MSI methods use direct ionization from a tissue location, with MS-based mass to charge ratios for identification of the nephrotoxicant, without requirements for labels or probes.

The utility of applying algorithms for ILbind to the structural human proteome was evaluated by Hu, et al., using cyclosporine as a model compound [6](#_ENREF_6), as it is known to have numerous binding partners. The authors used complementary methods to validate novel targets in the apoptosis, cell death, and cell survival pathways (Table 1). This methodology has the potential to inform about potential mechanisms of action and/or identification of drugs that could exhibit toxicity profiles.

Table 1. Proteomics Methods for Detecting Nephrotoxicity

| Method | Model Evaluated | Toxicants Evaluated | Representative Interacting Proteins | Pathways and Cellular Functions | Reference |
| --- | --- | --- | --- | --- | --- |
| SILAC | HK-2 | Vancomycin | List of 492 | List of 290 | [7](#_ENREF_7) |
| Proteomics of Renal Mitochondria – One and Two Dimensional Gels, Tryptic Digestion and MALDI-TOF MS, NanoESI MS | Rat kidney tissue | Gentamicin (renal cortex), cyclosporine A | Gentamicin - Dominant autoantigen Gp330, lysozyme, retinol binding protein, α-2-microglobulin.  Cyclosporine A – phospho-JAK2, phospho-STAT3, phospho-IKKɣ, p65, CD147, phospho-AKT | Gentamicin – gluconeogenesis, glycolysis, fatty acid utilization, TCA cycle.  Cyclosporine A – oxidative phosphorylation and fatty acid β-oxidation (both upregulated in low salt environment; decreased TCA cycle and ETS proteins. | [1](#_ENREF_1), [2](#_ENREF_2) |
| MSI of Tissue | Rat kidney tissue | Polymyxin (Colistin, PMB B1, PMBN) | Colistin – slight ⭡ in cortex/medulla ratio from day 1 (3.3) to 7 (5.8)  PMB B1 - ⭡ in cortex/medulla ratio from day 1 (5.0) to 7 (25.4)  PMBN – no change in cortex/medulla ratio from day 1 (2.1) to 7 (2.9) | N/A | [8](#_ENREF_8) |
| ILbind, molecular docking, molecular dynamics, surface plasmon resonance binding, enzymatic assays | datasets | Cyclosporine A | Calpain 2 (CAPN2), caspase 3 (CASP3), p38 MAP kinase 14 (MAPK14) | Apoptosis, cell death, cell survival | [6](#_ENREF_6) |
| Glycoprotein enrichment, LC-MS/MS, IHC | Mouse serum | Organic methylmercury | Serum amyloid P component (SAP), inter α-trypsin inhibitor heavy chain 4 (ITI-H4) | Oxidative stress, inflammation, immune function | [3](#_ENREF_3) |
| Renal mitochondrial enrichment | Rat kidney | Andrographolide sodium bisulfite | ⭣ES1 protein homolog, ⭡heat shock cognate 71kDa protein, ⭡peroxiredoxin-1 (Prdx1), ⭡cytochrome c oxidase subunit 5B (COX5B), ⭡prohibitin (PHB), ⭡threonine-tRNA ligase, ⭣pyruvate dehydrogenase E1 component subunit beta (PDH-β), ⭡voltage-dependent anion-selective channel protein 2 (VDAC2), ⭣voltage dependent anion selective channel protein 1 (VDAC1), ⭣adenylate kinase 2 (KAD2) | Oxidative stress, voltage gated depedent anion selective channels, TCA cycle | [4](#_ENREF_4) |

Abbreviations:

ETS – E26 transformation specific transcription factors

IHC - immunohistochemistry

ILbind – Inverse ligand binding predictions

JAK2 - Janus kinase 2

LC – liquid chromatography

MALDI-TOF – Matrix assisted laser desorption/ionization time of flight

MAPK – Mitogen activated protein kinase

MS – Mass spectrometry

MSI – Mass spectrometry imaging

NanoESI – Nano-electrospray ionization

PMB - Polymyxin B1 and polymyxin B nonapeptide

SILAC – Stable isotope labeling with amino acids in cell culture

STAT3 – Signal transducer and activator of transcription 3

TCA – Tricarboxylic acid cycleofiles.

References

1. Charlwood J, Skehel JM, King N, et al.: Proteomic analysis of rat kidney cortex following treatment with gentamicin. *J Proteome Res*. 1:73-82, 2002.

2. Klawitter J, Schmitz V, Brunner N, et al.: Low-salt diet and cyclosporine nephrotoxicity: changes in kidney cell metabolism. *J Proteome Res*. 11:5135-44, 2012.

3. Kim BH, Moon PG, Lee JE, et al.: Identification of potential serum biomarkers in mercury-treated mice using a glycoproteomic approach. *Int J Toxicol*. 32:368-75, 2013.

4. Xing WM, Yuan TJ, Xu JD, Gu LL, Liang P, Lu H: Proteomic identification of mitochondrial targets involved in andrographolide sodium bisulfite-induced nephrotoxicity in a rat model. *Environ Toxicol Pharmacol*. 40:592-9, 2015.

5. Effects of ramipril on cardiovascular and microvascular outcomes in people with diabetes mellitus: results of the HOPE study and MICRO-HOPE substudy. Heart Outcomes Prevention Evaluation Study Investigators. *Lancet*. 355:253-9, 2000.

6. Hu G, Wang K, Groenendyk J, et al.: Human structural proteome-wide characterization of Cyclosporine A targets. *Bioinformatics*. 30:3561-6, 2014.

7. Li ZL, Zhou SF: A SILAC-Based Approach Elicits the Proteomic Responses to Vancomycin-Associated Nephrotoxicity in Human Proximal Tubule Epithelial HK-2 Cells. *Molecules*. 21:148, 2016.

8. Nilsson A, Goodwin RJ, Swales JG, et al.: Investigating nephrotoxicity of polymyxin derivatives by mapping renal distribution using mass spectrometry imaging. *Chem Res Toxicol*. 28:1823-30, 2015.

9. van Hal SJ, Paterson DL, Lodise TP: Systematic review and meta-analysis of vancomycin-induced nephrotoxicity associated with dosing schedules that maintain troughs between 15 and 20 milligrams per liter. *Antimicrob Agents Chemother*. 57:734-44, 2013.

10. Ong SE, Blagoev B, Kratchmarova I, et al.: Stable isotope labeling by amino acids in cell culture, SILAC, as a simple and accurate approach to expression proteomics. *Mol Cell Proteomics*. 1:376-86, 2002.

11. Falagas ME, Kasiakou SK: Toxicity of polymyxins: a systematic review of the evidence from old and recent studies. *Crit Care*. 10:R27, 2006.
